# Supplementary material for: A rapid and sensitive electrochemiluminescent sensor for nitrites based on C3N4 quantum dots on C3N4 nanosheets
Source: Royal Society of Chemistry journal article supplement (doi:10.1039/c6ra22527f), 2016-01-01
Supplement: c6ra22527f1.pdf [file c6ra22527f1.pdf]

## Supporting Information

### **A rapid and sensitive electrochemiluminescent sensor for nitrite based on C<sub>3</sub>N<sub>4</sub> quantum dots@ C<sub>3</sub>N<sub>4</sub> nanosheet**

**Xi Zhu<sup>a\*</sup>, Fangxia Kou<sup>a</sup>, Huifeng Xu<sup>b\*</sup>, Guidi Yang<sup>a</sup>**

<sup>a</sup> College of Life Sciences, Fujian Agriculture and Forestry University, 350002,  
Fuzhou, Fujian, China.

E-mail: zhuxi@5810.com

<sup>b</sup> Academy of Integrative Medicine, Fujian University of Traditional Chinese  
Medicine, 350002, Fuzhou, Fujian, P. R. China.

E-mail: hfxu84@163.com

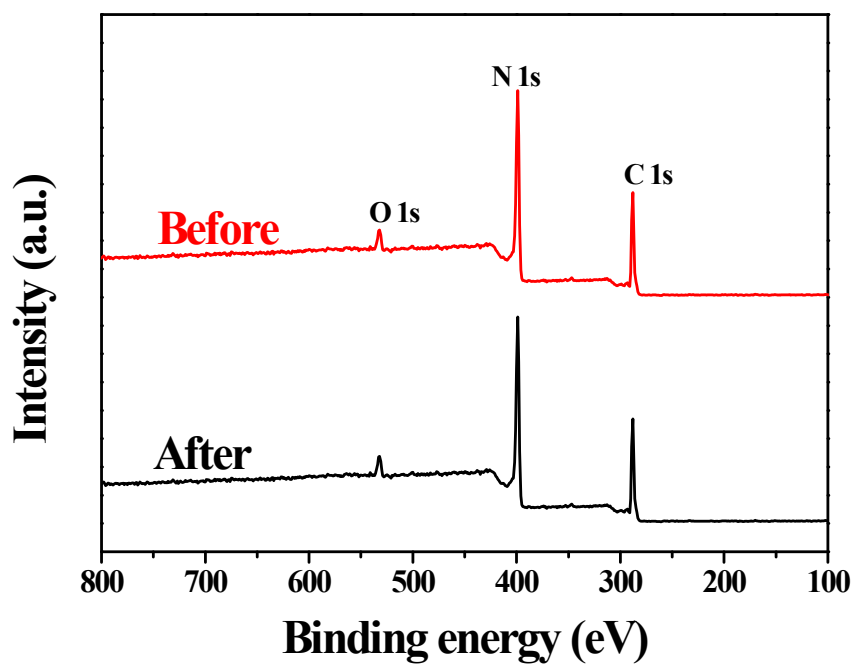

Fig. S1 The XPS spectra of CNQD@CNNS before and after the reaction with nitrite.

Table S1 The determination of nitrite in drink water

| Drink water | Added ( $\mu\text{M}$ ) | Found ( $\mu\text{M}$ ) | Recovery (%) |
|-------------|-------------------------|-------------------------|--------------|
| 1           | 1                       | 1.03                    | 103          |
| 2           | 2                       | 1.89                    | 94.5         |
| 3           | 3                       | 3.13                    | 104.3        |
